# Supplementary material for: Selective Functionalization of High-Resolution Cu2O Nanopatterns via Galvanic Replacement for Highly Enhanced Gas Sensing Performance
Source: MDPI journal article supplement (doi:10.3390/s18124438), 2018-12-15
Supplement: s1 [file s1]

Supporting Information

# Selective Functionalization of High-Resolution Cu<sub>2</sub>O Nanopatterns via Galvanic Replacement for Highly Enhanced Gas Sensing Performance

Ju Ye Kim <sup>1,2,†</sup>, Soo-Yeon Cho <sup>1,2,†</sup> and Hee-Tae Jung <sup>1,2,\*</sup>

<sup>1</sup> Department of Chemical and Biomolecular Engineering (BK-21 Plus), Korea Advanced Institute of Science and Technology (KAIST), 291 Daehak-ro, Yuseong-gu, Daejeon 34141, Korea; juyekim@kaist.ac.kr (J.Y.K); chosooyeon@kaist.ac.kr (S.-Y.C)

<sup>2</sup> Korea Advanced Institute of Science and Technology (KAIST) Institute for NanoCentury, 291 Daehak-ro, Yuseong-gu, Daejeon 34141, Korea

† These authors contributed equally to this work.

\* Correspondence: heetae@kaist.ac.kr; Tel.: +82-042-350-3931

## Table of Contents

1. Schematic illustrations of expected galvanic reaction process.
2. Scanning electron microscope (SEM) observations depending on various reaction condition.
3. XRD spectrum of the Cu<sub>2</sub>O nanopattern before and after thermal oxidation.
4. Photo and SEM image of the Cu<sub>2</sub>O nanopattern sensors.
5. Elemental distribution analysis by transmission electron microscopy (TEM) - energy dispersive X-ray spectroscopy (EDS).
6. The composition analysis of over-galvanic reacted sample to confirm a selective decoration property of galvanic reaction.
7. Schematic of the overall gas delivery system.
8. NO<sub>2</sub> gas sensing performance comparison based on CuO or Cu<sub>2</sub>O materials.
9. Response and recovery time of the Cu<sub>2</sub>O/Pt nanopattern sensor to 1-4 ppm NO<sub>2</sub>.
10. Selectivity characterization of the Cu<sub>2</sub>O/Pt nanopattern sensor.
11. Long-term stability of the Cu<sub>2</sub>O/Pt nanopattern sensor.

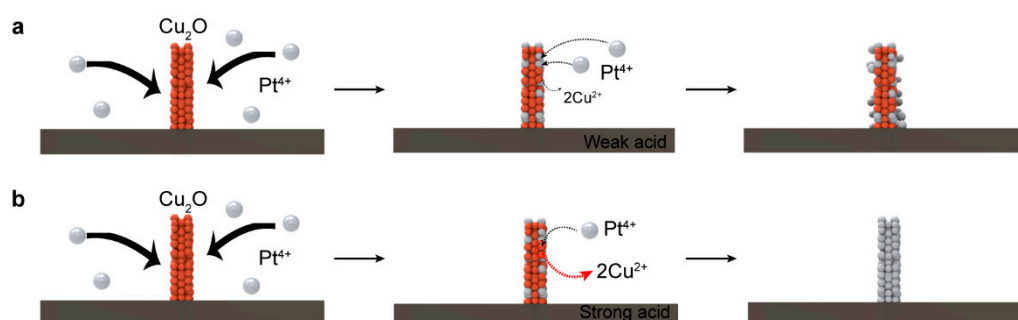

**Figure S1.** Schematic illustrations of expected galvanic replacement process. **(a)** When the reaction occurs in weak acid condition, both Pt reduction on Cu<sub>2</sub>O surface and replacement for Cu<sub>2</sub>O occur due to the mild limitation of galvanic reaction. On the other hand, **(b)** in strong acid condition without adding NaOH, galvanic reaction process predominates resulting in complete replacing Cu<sub>2</sub>O with Pt.

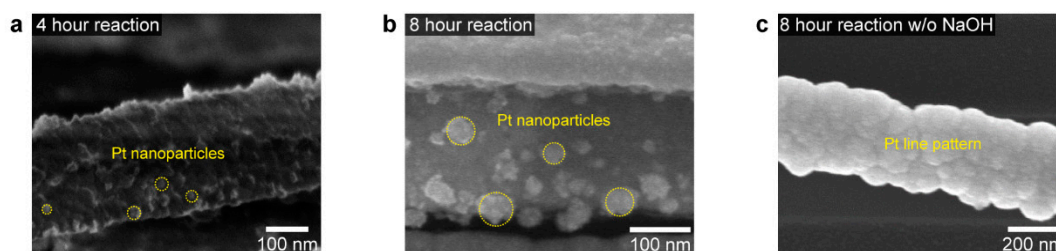

**Figure S2.** SEM images of (a) 4 hour reaction in pH 5 solution (with NaOH), (b) 8 hour reaction in pH 5 solution (with NaOH) and (c) 8 hour reaction in pH 2 solution (without NaOH). In a mild galvanic reaction condition, Pt particle aggregation occurs allowing the reduction of Pt rather than replacing Cu<sub>2</sub>O with Pt. In a strong condition, however, all Cu<sub>2</sub>O replaced into Pt wire.

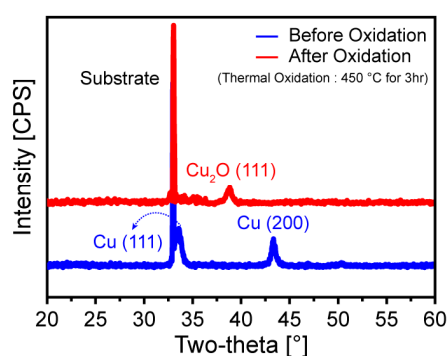

**Figure S3.** XRD spectrum of the Cu<sub>2</sub>O nanopattern before and after thermal oxidation.

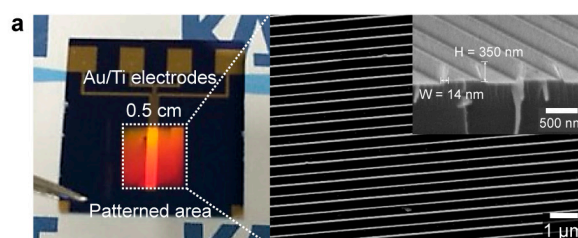

**Figure S4.** Photo and SEM image of the Cu<sub>2</sub>O nanopattern sensors.

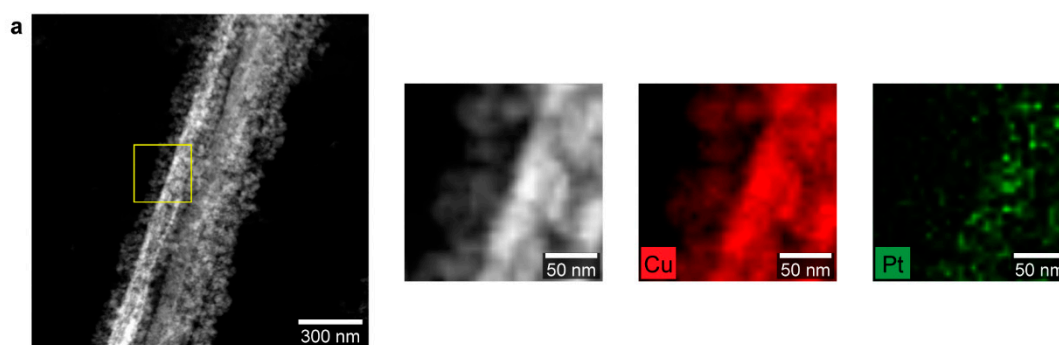

**Figure S5.** Elemental distribution analysis of the fabricated Pt/Cu<sub>2</sub>O pattern array by energy-dispersive X-ray spectroscopy (EDS). (a) Left figure shows high-angle annular dark-field scanning transmission electron microscopy (HAADF-STEM) image of selectively Pt functionalized Cu<sub>2</sub>O nanopattern and its elemental mapping analysis is shown sequentially.

## TEM Sample Preparation

For preparation of TEM sample, poly(methylmethacrylate) (PMMA, Sigma-Aldrich) was coated on synthesized Cu<sub>2</sub>O line pattern on SiO<sub>2</sub> substrates (3000 rpm, 45 s). After thermal treatment at 180°C for 3 min to evaporate the solution, the substrate was immersed on potassium hydroxide (KOH) 2M solution at 95°C for separating the line pattern from the substrate. After 2–3 hours, line pattern film was floating which means separation from the SiO<sub>2</sub> substrate. Once the film was cleaned with acetone and water, it was transferred to Ni TEM grid and washed with acetone once again and then dried in the oven overnight.

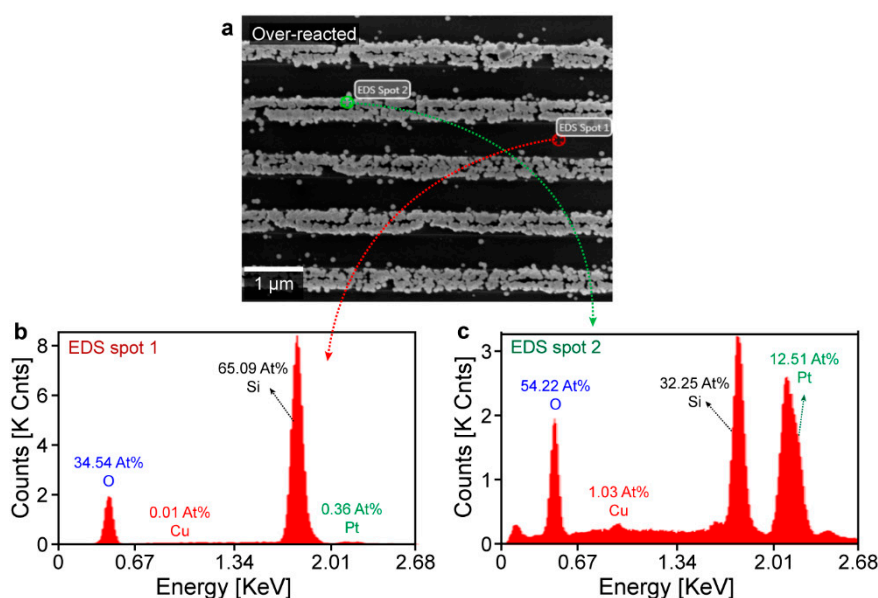

**Figure S6.** The composition analysis of over-galvanic reacted sample (complete reaction from Cu<sub>2</sub>O to Pt) in low magnification. **(a)** Scanning electron microscopy (SEM) image in low magnification. Point spot energy-dispersive X-ray spectroscopy (EDS) analysis for **(b)** the space between the line patterns and **(c)** line pattern surface itself.

**Table S1.** NO<sub>2</sub> gas sensing performance comparison based on CuO or Cu<sub>2</sub>O materials.

| Sensing Material                           | NO <sub>2</sub> concentration (ppm) | Sensor response | Response definition | Operating temperature (°C) | ref       |
|--------------------------------------------|-------------------------------------|-----------------|---------------------|----------------------------|-----------|
| Cu <sub>2</sub> O thin film                | 1.5                                 | 3               | $(R_g - R_o)/R_o$   | 150                        | 1         |
| CuO particulates                           | 50                                  | 0.036           | $(R_a - R_g)/R_g$   | 150                        | 2         |
| CuO nanowires                              | 4                                   | 1.17            | $R_g/R_a$           | ~370                       | 3         |
| CuO plates                                 | 50                                  | 2.2             | $R_a/R_g$           | 200                        | 4         |
| p-CuO nanowires                            | 10                                  | 0.55            | $(R_g - R_o)/R_o$   | 300                        | 5         |
| 2.2 Cr-CuO                                 | 100                                 | 134.2           | $R_a/R_g$           | 250                        | 6         |
| Cu <sub>2</sub> O/CuO-10                   | 0.001                               | 13.5            | $(I_g - I_a)/I_a$   | RT                         | 7         |
| Pt/Cu <sub>2</sub> O ultrahigh nanopattern | 4                                   | 2.75            | $R_a/R_g$           | 300                        | This work |

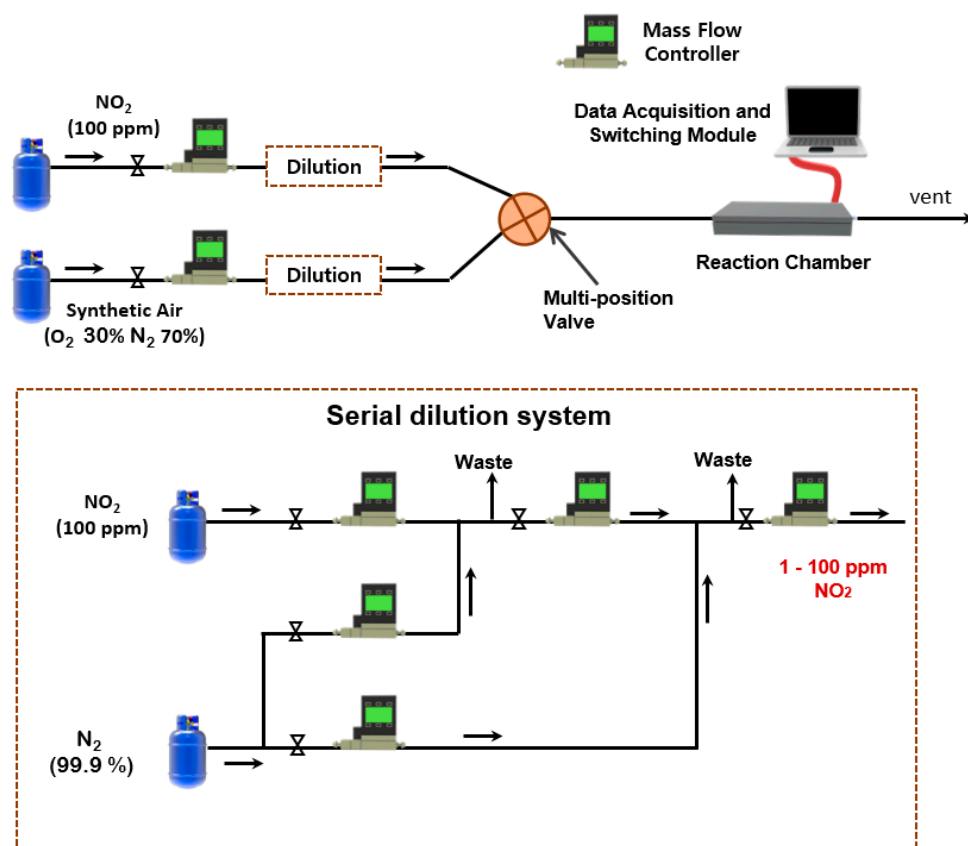

**Figure S7.** Schematic of the overall gas delivery system.  $\text{NO}_2$  and synthetic air was introduced in a controlled manner into the reaction chamber by using the MFC, tubing system, and multi-position valve. The serial dilution system was also used to obtain 1–100 ppm concentrations of the  $\text{NO}_2$ .

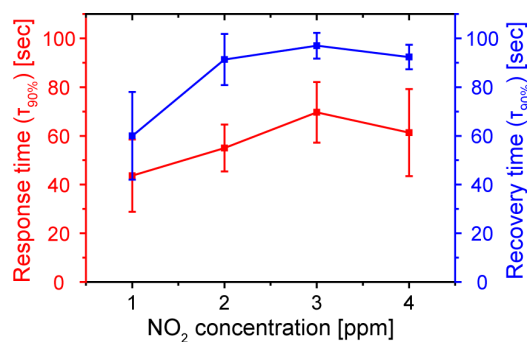

**Figure S8.** Response and recovery time of the  $\text{Cu}_2\text{O}/\text{Pt}$  nanopattern sensor to 1–4 ppm  $\text{NO}_2$ .

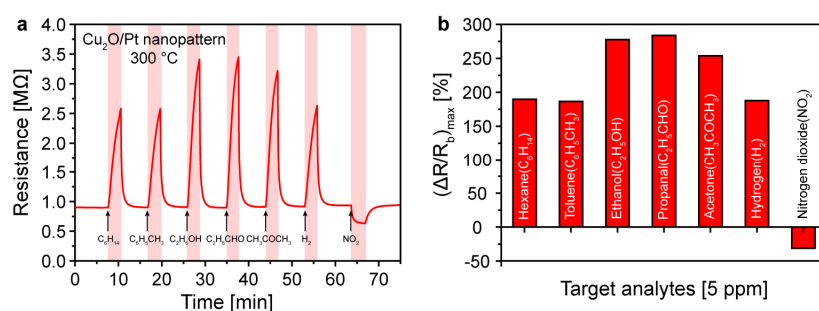

**Figure S9.** Selectivity characterization of the  $\text{Cu}_2\text{O}/\text{Pt}$  nanopattern sensor. (a) Real-time response behavior of the sensors to various analytes including hexane, toluene, ethanol, propanal, acetone, hydrogen,  $\text{NO}_2$  (all 5 ppm). (b) Maximum response amplitudes of the sensors to each analytes.

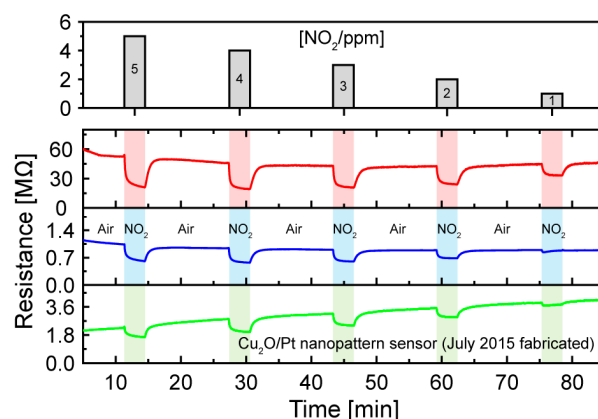

**Figure S10.** Long-term stability of the Cu<sub>2</sub>O/Pt nanopattern sensor (Real-time sensing signals to 1–5 ppm NO<sub>2</sub> with sensors fabricated three years ago).

## References

1. Shishiyanu, S.T.; Shishiyanu, T.S.; Lupan, O.I. Novel NO<sub>2</sub> gas sensor based on cuprous oxide thin films, *Sens. Actuators, B.*, **2006**, *113*, 468–476, doi: 10.1016/j.snb.2005.03.061.
2. Das, A.; Venkataramana, B.; Partheephan, D.; Prasad, A.K.; Dhara, S.; Tyagi, A.K. Facile synthesis of nanostructured CuO for low temperature NO<sub>2</sub> sensing, *Phys. E.*, **2013**, *54*, 40–44, doi: 10.1016/j.physe.2013.06.007.
3. Kim, Y.-S.; Hwang, I.-S.; Kim, S.-J.; Lee, C.-Y.; Lee, J.-H. CuO nanowire gas sensors for air quality control in automotive cabin. *Sens. Actuators, B.*, **2008**, *135*, 298–303, doi: 10.1016/j.snb.2008.08.026.
4. Li, Y.; Liang, J.; Tao, Z.; Chen, J. CuO particles and plates: Synthesis and gas-sensor application, *Mater. Res. Bull.*, **2008**, *43*, 2380–2385, doi: 10.1016/j.materresbull.2007.07.045.
5. Kim, J.-H.; Katoch, A.; Choi, S.-W.; Kim, S.S. Growth and sensing properties of networked p-CuO nanowires, *Sens. Actuators, B.*, **2015**, *212*, 190–195, doi: 10.1016/j.snb.2014.12.081.
6. Kim, K.-M.; Jeong, H.-M.; Kim, H.-R.; Choi, K.-I.; Kim, H.-J.; Lee, J.-H. Selective Detection of NO<sub>2</sub> Using Cr-Doped CuO Nanorods, *Sensors.*, **2012**, *12*, 8013–8025, doi: 10.3390/s120608013.
7. Hu, J.; Zou, C.; Su, Y.; Li, M.; Han, Y.; Kong, E.S.-W.; Yang, Z.; Zhang, Y. An ultrasensitive NO<sub>2</sub> gas sensor based on a hierarchical Cu<sub>2</sub>O/CuO mesocrystal nanoflower. *J. Mater. Chem. A.*, **2018**, *6*, 17120–17131, doi: 10.1039/c8ta04404j.

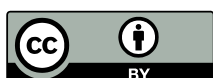

© 2018 by the authors. Licensee MDPI, Basel, Switzerland. This article is an open access article distributed under the terms and conditions of the Creative Commons Attribution (CC BY) license (<http://creativecommons.org/licenses/by/4.0/>).
